# Supplementary material
Source: HighWire-hosted journal article supplement (https://gut.bmj.com/content/65/10/1681)
Supplement: inline-supplementary-material-3 [file inline-supplementary-material-3.pdf]

## PSC PATIENTS QUESTIONNAIRE

Family name: ..... Given name: .....

Sex: M / F

Date of birth: ...../...../..... (dd/mm/yyyy) Place of birth: .....

Date this questionnaire was completed: ...../...../..... (dd/mm/yyyy)

Address: .....  
.....

Phone number/GSM: .....

E-mail: .....

General practitioner: Name: .....

Address: .....  
.....

Hepatologist (if not in UZ Leuven): Name: .....

Hospital: .....

Address: .....

1. You suffer from primary sclerosing cholangitis (PSC).

In which year was the diagnosis confirmed? ..... (or age: ..... years)

In which hospital was the diagnosis made? .....

By which physician was the diagnosis made? .....

2. Do you suffer from **any other disease(s)**?  No  Yes

If yes, which disease(s)? .....

3. Have you ever had a **venous thrombosis** (blood clot in a vein), an **embolus** or **phlebitis** (inflammation of a vein)?  No  Yes

4. Have you ever had one of the undermentioned problems **outside the gastrointestinal tract**?

No  Yes

If yes, check the appropriate box:

aphthous ulcerations in the mouth (not lip herpes)

eye inflammation (conjunctivitis, keratitis, uveitis, iritis)

eczema,  psoriasis,  erythema nodosum,  pyoderma gangrenosum

joint pain,  rheumatoid arthritis,  sacroiliitis,  ankylosing spondylitis (Bechterew's disease)

anemia

reduced bone density (osteoporosis , osteopenia)

other: .....

**5. Surgery.**

Have you ever had an **appendectomy** (surgery for appendicitis)?

No  Yes, date ..... (year)

Have you ever had **other intestinal surgery**?

No  Yes, number: .....

| Surgery | Year | Description |
|---------|------|-------------|
| 1       |      |             |
| 2       |      |             |
| 3       |      |             |
| 4       |      |             |

Have you ever had a **liver transplant**?

No  Yes, number: .....

| Surgery | Year | Reason for transplant |
|---------|------|-----------------------|
| 1       |      |                       |
| 2       |      |                       |
| 3       |      |                       |
| 4       |      |                       |

**6.** What is your **height**? ..... cm

What is your current **weight**? ..... kg

**7.** Which **medications** do you take for your **liver disease**?

.....  
.....

**8.** Do you currently take any **medication for other purposes** (oral contraceptives included)?

No  Yes *If yes, which medication?*

.....  
.....  
.....

**9.** Have you taken **antibiotics** in the past month?  No  Yes

*If yes, which antibiotic(s)?* .....

*duration of use (start and stop date): from* ..... / ..... / ..... *until* ..... / ..... / .....

**10. Alcohol consumption.** How often do you have a drink containing alcohol?

- Never
- Monthly or less - How many glasses of alcohol do you drink on average per month? ..... (number)
- Weekly - How many glasses of alcohol do you drink on average per week? ..... (number)
- Daily - How many glasses of alcohol do you drink on average per day? ..... (number)

**11. Smoking habits.** Please check the box or boxes that apply:

- I have **NEVER** smoked.
- I am an **ACTIVE** smoker since the year..... (or age: ..... years).  
I smoke approximately ..... (number) cigarettes per day.  
I smoked at the moment when the diagnosis of PSC was made:  No  Yes
- I started smoking in the year..... (or age: ..... years) and **QUIT** in the year.....  
I smoked approximately ..... (number) cigarettes per day.  
I smoked at the moment when the diagnosis of PSC was made:  No  Yes

**12. Do you follow a special diet?**  No  Yes

If yes, specify diet: .....

**13. Have you taken probiotics in the last month?**  No  Yes

If yes, please mark which products you used, how frequent (how many days per week) en how long have you used it.

| <u>Probiotica</u>                                                                    | <u>How frequent?</u> | <u>How long?</u> |
|--------------------------------------------------------------------------------------|----------------------|------------------|
| <input type="checkbox"/> Yakult                                                      | .....                | .....            |
| <input type="checkbox"/> Actimel (Danone)                                            | .....                | .....            |
| <input type="checkbox"/> Activia (Danone)                                            | .....                | .....            |
| <input type="checkbox"/> Essensis (Danone)                                           | .....                | .....            |
| <input type="checkbox"/> Vifit (Campina)                                             | .....                | .....            |
| <input type="checkbox"/> Optifit (Aldi)                                              | .....                | .....            |
| <input type="checkbox"/> Proviact (Lidl)                                             | .....                | .....            |
| <input type="checkbox"/> Nestlé                                                      | .....                | .....            |
| <input type="checkbox"/> VSL#3                                                       | .....                | .....            |
| <input type="checkbox"/> Products with 'bifidus'<br>(regular yogurt does not count!) | .....                | .....            |
| <input type="checkbox"/> Other (which? .....) )                                      | .....                | .....            |
